# Supplementary material
Source: publisher figshare collection journal article supplement (https://karger.figshare.com/ndownloader/files/25659980)
Supplement: Supplementary file 1 [file 25659980]

**Suppl. Table 2** List of all drugs implicated to have caused drug-induced liver injury

|  | **ANA† < 1:400**  **(n=102; 71 %)** | **ANA ≥ 1:400**  **(n=41; 29 %)** |
| --- | --- | --- |
| **Acitretin** | 1 (1.0 %) | 0 (0 %) |
| **Allopurinol** | 1 (1.0 %) | 0 (0 %) |
| **Amitriptyline** | 1 (1.0 %) | 0 (0 %) |
| **Amoxicillin/clavulanic acid** | 5 (4.9 %) | 2 (4.9 %) |
| **Ampicillin/sulbactam** | 1 (1.0 %) | 0 (0 %) |
| **Androstendione** | 1 (1.0 %) | 0 (0 %) |
| **Apixaban** | 2 (2.0 %) | 0 (0 %) |
| **Aripiprazol** | 1 (1.0 %) | 0 (0 %) |
| **Atorvastatin** | 5 (4.9 %) | 3 (7.3 %) |
| **Carbamazepine** | 1 (1.0 %) | 0 (0 %) |
| **Carbimazole** | 2 (2.0 %) | 0 (0 %) |
| **Cefuroxime** | 3 (2.9 %) | 1 (2.4 %) |
| **Celecoxib** | 0 (0 %) | 1 (2.4 %) |
| **Cetirizine** | 1 (1.0 %) | 0 (0 %) |
| **Chelidonium** | 0 (0 %) | 1 (2.4 %) |
| **Chlorella** | 1 (1.0 %) | 0 (0 %) |
| **Chondroitin** | 1 (1.0 %) | 0 (0 %) |
| **Ciprofloxacin** | 2 (2.0 %) | 0 (0 %) |
| **Clarithromycin** | 1 (1.0 %) | 0 (0 %) |
| **Dabigatran** | 0 (0 %) | 2 (4.9 %) |
| **Desflurane** | 1 (1.0 %) | 0 (0 %) |
| **Desogestrel** | 1 (1.0 %) | 0 (0 %) |
| **Diclofenac** | 9 (8.8 %) | 2 (4.9 %) |
| **Duloxetine** | 1 (1.0 %) | 0 (0 %) |
| **Enoxaparin** | 1 (1.0 %) | 1 (2.4 %) |
| **Epigallocatechin gallate** | 1 (1.0 %) | 0 (0 %) |
| **Estriol** | 0 (0 %) | 1 (2.4 %) |
| **Ethinylestradiol/levonorgestrel** | 0 (0 %) | 1 (2.4 %) |
| **Eugenol** | 1 (1.0 %) | 1 (2.4 %) |
| **Flupirtine** | 1 (1.0 %) | 1 (2.4 %) |
| **Fluspirilene** | 1 (1.0 %) | 0 (0 %) |
| **Fosfomycin** | 1 (1.0 %) | 0 (0 %) |
| **Glatiramer acetate** | 1 (1.0 %) | 1 (2.4 %) |
| **Hypericum perforatum** | 1 (1.0 %) | 0 (0 %) |
| **Iberogast** | 0 (0 %) | 1 (2.4 %) |
| **Ibuprofen** | 1 (1.0 %) | 0 (0 %) |
| **Imatinib** | 1 (1.0 %) | 0 (0 %) |
| **Indometacin** | 1 (1.0 %) | 0 (0 %) |
| **Infliximab** | 1 (1.0 %) | 2 (4.9 %) |
| **Isoniazid** | 1 (1.0 %) | 0 (0 %) |
| **Kratom** | 0 (0 %) | 1 (2.4 %) |
| **Leflunomide** | 1 (1.0 %) | 0 (0 %) |
| **Metamizole** | 9 (8.8 %) | 7 (17.1 %) |
| **Methocarbamol** | 1 (1.0 %) | 0 (0 %) |
| **Methyldopa** | 1 (1.0 %) | 1 (2.4 %) |
| **Methylprednisolone** | 3 (2.9 %) | 1 (2.4 %) |
| **Minocycline** | 2 (2.0 %) | 0 (0 %) |
| **Mirtazapine** | 1 (1.0 %) | 0 (0 %) |
| **Moxifloxacin** | 1 (1.0 %) | 0 (0 %) |
| **Naproxen** | 1 (1.0 %) | 0 (0 %) |
| **Natalizumab** | 1 (1.0 %) | 0 (0 %) |
| **Nivolumab** | 1 (1.0 %) | 0 (0 %) |
| **Olanzapine** | 1 (1.0 %) | 0 (0 %) |
| **Omeprazole** | 1 (1.0 %) | 0 (0 %) |
| **Oxomemazine** | 1 (1.0 %) | 0 (0 %) |
| **Pantoprazole** | 1 (1.0 %) | 1 (2.4 %) |
| **Pembrolizumab** | 1 (1.0 %) | 0 (0 %) |
| **Phenprocoumon** | 3 (2.9 %) | 1 (2.4 %) |
| **Piperacillin/tazobactam** | 0 (0 %) | 1 (2.4 %) |
| **Pirfenidon** | 0 (0 %) | 1 (2.4 %) |
| **Potaba** | 2 (2.0 %) | 0 (0 %) |
| **Prednisolone** | 1 (1.0 %) | 0 (0 %) |
| **Pregabalin** | 1 (1.0 %) | 0 (0 %) |
| **Propofol** | 4 (3.9 %) | 2 (4.9 %) |
| **Rifampicin** | 1 (1.0 %) | 0 (0 %) |
| **Rivaroxaban** | 2 (2.0 %) | 0 (0 %) |
| **Rupatadin** | 0 (0 %) | 1 (2.4 %) |
| **Sertraline** | 1 (1.0 %) | 0 (0 %) |
| **Sevoflurane** | 1 (1.0 %) | 0 (0 %) |
| **Silibinin** | 1 (1.0 %) | 0 (0 %) |
| **Simvastatin** | 1 (1.0 %) | 1 (2.4 %) |
| **Sumatriptan** | 0 (0 %) | 1 (2.4 %) |
| **Sunitinib** | 1 (1.0 %) | 0 (0 %) |
| **Tadalafil** | 0 (0 %) | 1 (2.4 %) |
| **Trimethoprim/sulfamethoxazole** | 1 (1.0 %) | 0 (0 %) |

Values are stated as % (n). † ANA:antinuclear antibodies.
